# Supplementary material for: MOF-derived hollow Co4S3/C nanosheet arrays grown on carbon cloth as the anode for high-performance Li-ion batteries
Source: Royal Society of Chemistry journal article supplement (doi:10.1039/d0dt03070h), 2020-01-01
Supplement: d0dt03070h1.pdf [file d0dt03070h1.pdf]

## Supporting Information

### MOF-derived Hollow $\text{Co}_4\text{S}_3/\text{C}$ Nanosheet Arrays Grown on Carbon Cloth as Anode for high-performance Li-ion Batteries

Mingchen Shi<sup>+a</sup>, Qiang Wang<sup>+a</sup>, Junwei Hao<sup>a</sup>, Huihua Min<sup>b</sup>, Hairui You<sup>a</sup>, Xiaomin Liu<sup>\*a</sup> and Hui Yang<sup>\*a</sup>

a College of Materials Science and Engineering, Nanjing Tech University, Nanjing, Jiangsu, China.

Email [Liuxm@njtech.edu.cn](mailto:Liuxm@njtech.edu.cn), [yanghui@njtech.edu.cn](mailto:yanghui@njtech.edu.cn)

b. Electron Microscope Lab, Nanjing Forestry University, Nanjing, Jiangsu, China.

+ These authors contributed equally to this work

\* *Corresponding author.*

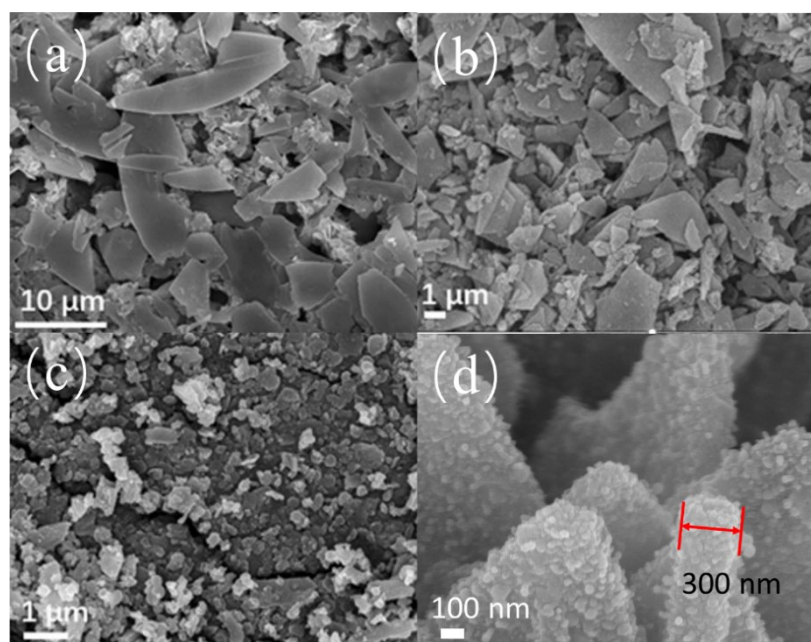

Fig. S1 (a-c) SEM images of Co-MOF, Co/C,  $\text{Co}_4\text{S}_3/\text{C}$  (d) high-magnification SEM of h- $\text{Co}_4\text{S}_3/\text{C}$  NA@CC

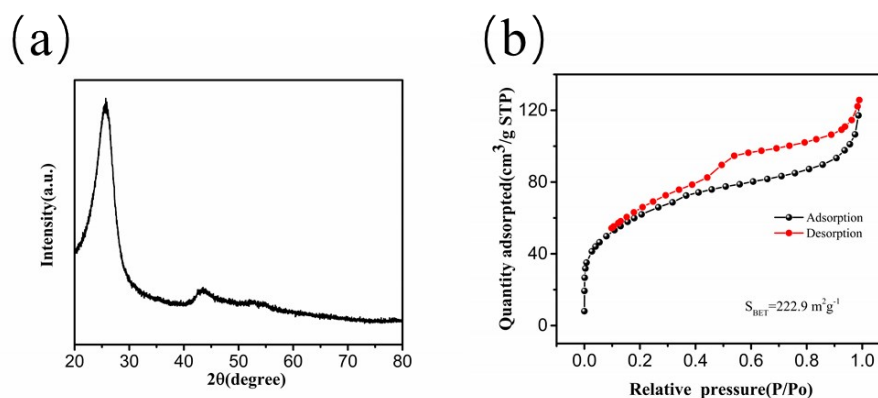

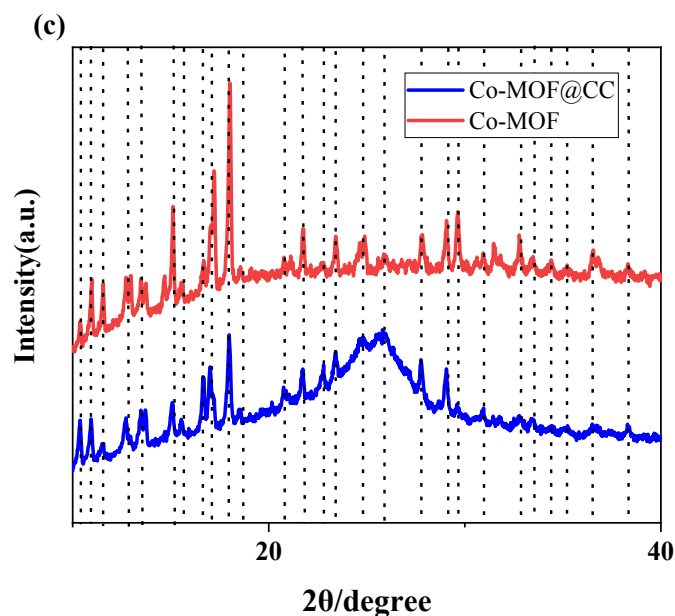

Fig. S2 (a) XRD pattern of carbon cloth (b) Nitrogen adsorption and desorption curve of  $\text{Co}_4\text{S}_3/\text{C}$  (c) Contrast between Co-MOF@CC and Co-MOF.

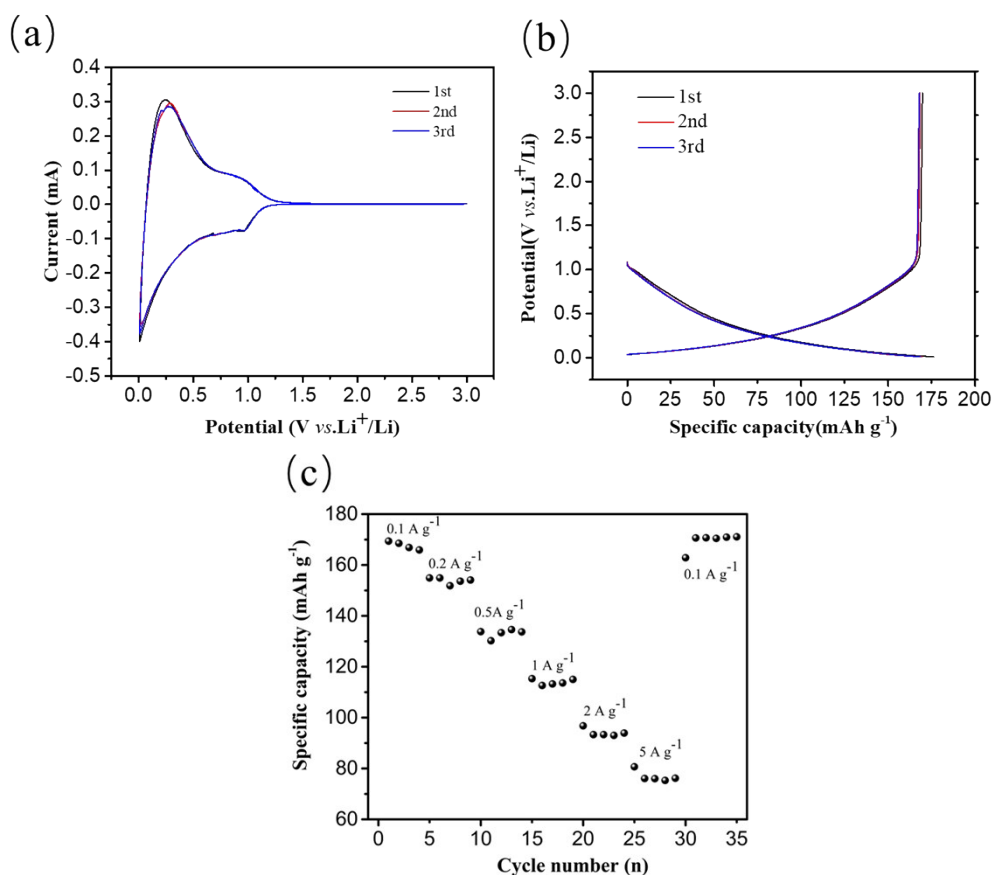

Fig. S3 (a) CV curves of bare CC anode at the scan rate of  $0.1 \text{ mV s}^{-1}$  between 0.01 and 3.0 V (b) Lithiation and delithiation voltage profiles of bare CC anode at the current density of  $0.1 \text{ A g}^{-1}$  for the first three cycles (c) The rate capability of bare CC anode

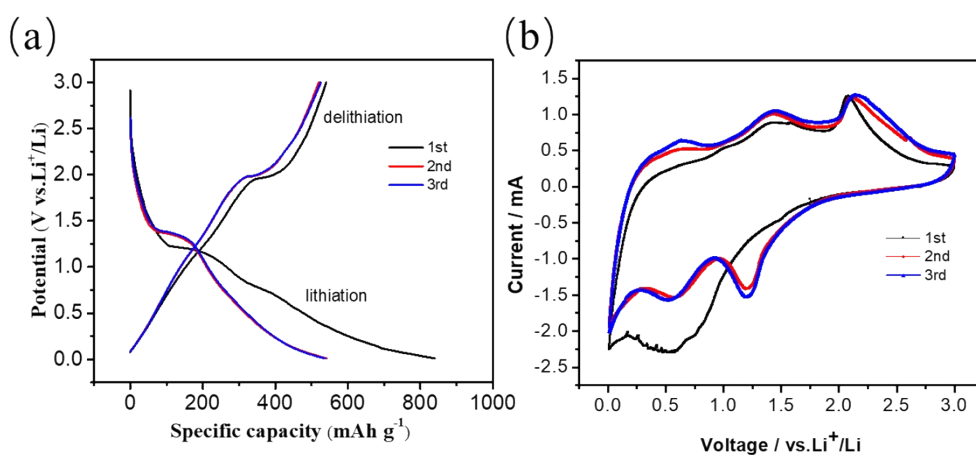

Fig. S4 (a) Lithiation and delithiation voltage profiles of bare  $\text{Co}_4\text{S}_3/\text{C}$  anode at the current density of  $0.1 \text{ A g}^{-1}$  for the first three cycles (b) CV curves of bare  $\text{Co}_4\text{S}_3/\text{C}$  anode at the scan rate of  $0.2 \text{ mV s}^{-1}$  between 0.01 and 3.0 V

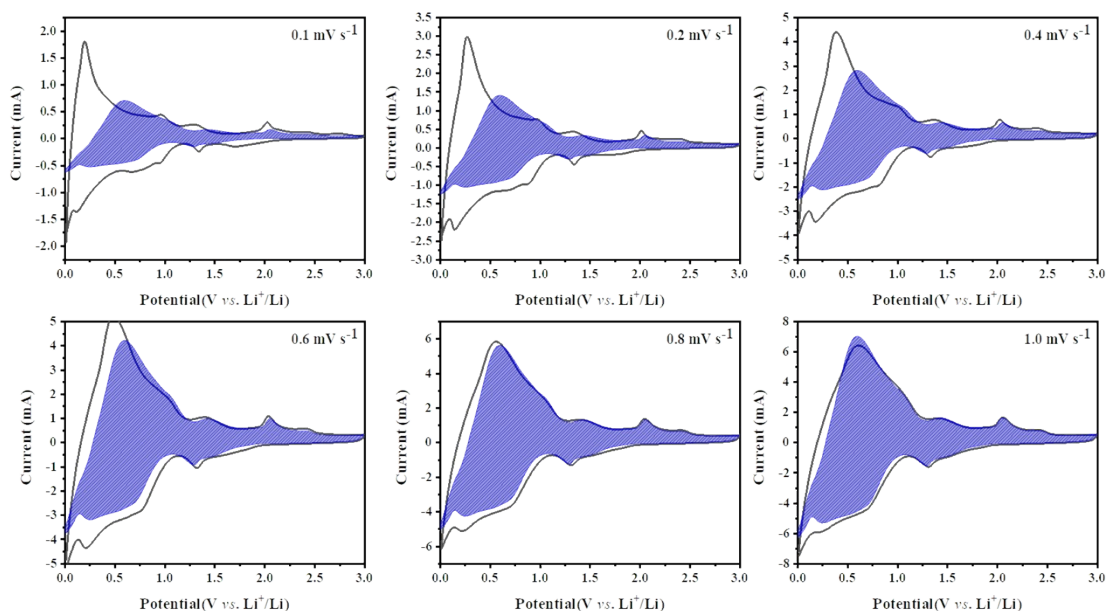

Fig. S5 Capacitive charge storage contribution of  $\text{h-Co}_4\text{S}_3/\text{C NA@CC}$  anode at different scan rates (shaded region)

Table S1. Comparison of electrochemical properties of various CoS-based composite anode

| Material                                           | Current density<br>(mA g <sup>-1</sup> ) | Capacity<br>(mAh g <sup>-1</sup> ) | Cycle number                          | Refence   |
|----------------------------------------------------|------------------------------------------|------------------------------------|---------------------------------------|-----------|
| Co <sub>1-x</sub> S/NCS                            | 200                                      | 796.3                              | 100 <sup>th</sup>                     | 1         |
| CoS <sub>x</sub> hollow spheres                    | 500                                      | 1012.1                             | 100 <sup>th</sup>                     | 2         |
| CoS <sub>x</sub> /RGO                              | 100                                      | 796                                | 50 <sup>th</sup>                      | 3         |
| CoS <sub>2</sub> -NF/rGO-NS                        | 500                                      | 769                                | 200 <sup>th</sup>                     | 4         |
| Co <sub>3</sub> S <sub>4</sub> @C@MoS <sub>2</sub> | 200                                      | 672.6                              | 200 <sup>th</sup>                     | 5         |
| lantern-like CoS<br>hierarchitectures              | 1000/100                                 | 352/477                            | 1000 <sup>th</sup> /400 <sup>th</sup> | 6         |
| h-Co <sub>4</sub> S <sub>3</sub> /C NA@CC          | 1000/2000                                | 720.0/321.0                        | 200 <sup>th</sup> /500 <sup>th</sup>  | This work |

1.Z. Yang, J. Wang, H.-T. Wu, F.-J. Kong, W.-Y. Yin, H.-J. Cheng, X.-Y. Tang, B. Qian, S. Tao, J. Yi, Y.-S. Ma and R.-X. Yuan, *Applied Surface Science*, 2019, **479**, 693-699.

2.Y. Xiao, J.-Y. Hwang, I. Belharouak and Y.-K. Sun, *Nano Energy*, 2017, **32**, 320-328.

3.J. Zhu and X. Ding, *Materials Letters*, 2019, **253**, 22-25.

4.S.-Y. Liao, T.-T. Cui, S.-Y. Zhang, J.-J. Cai, F. Zheng, Y.-D. Liu and Y.-G. Min, *Electrochimica Acta*, 2019, DOI: 10.1016/j.electacta.2019.134992, 134992.

5.J. Dai, J. Li, Q. Zhang, M. Liao, T. Duan and W. Yao, *Materials Letters*, 2019, **236**, 483-486.

6. W Lin, Y Huang and G He, *CrystEngComm*, 2018, **20**,672 .
